# Supplementary material
Source: PubMed Central journal article supplement (PMC6054548)
Supplement: NIHMS958659-supplement-Online_Resource.pdf [file NIHMS958659-supplement-Online_Resource.pdf]

**Online Resources**

**Online Resource 1.** The difference between self-reported and measured BMI vs. measured BMI in the WCHFS ( $n = 243$ )

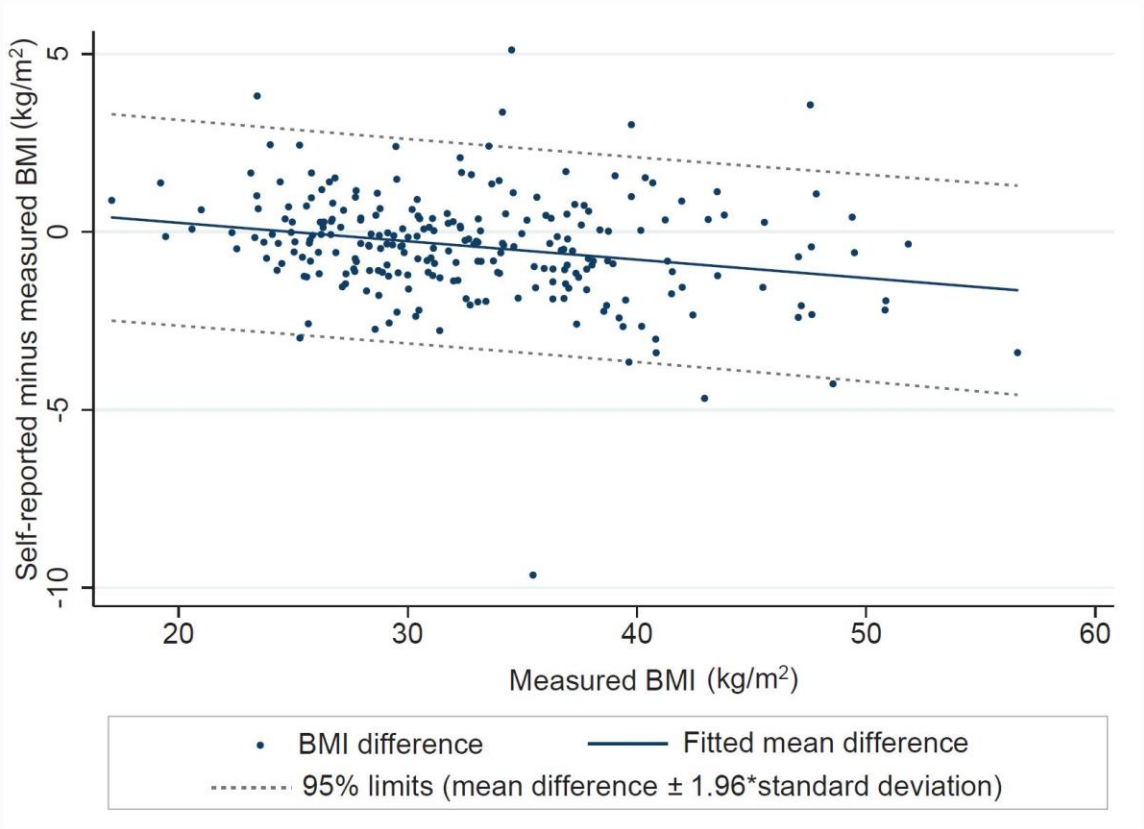

**Online Resource 2.** Cross-tabulation and Cohen's kappa between self-reported and measured BMI categories, the WCHFS ( $n = 243$ )

| Measured BMI, kg/m <sup>2</sup> | <i>n</i> | Self-reported BMI, kg/m <sup>2</sup> (Row %) |         |         |         |      | kappa |
|---------------------------------|----------|----------------------------------------------|---------|---------|---------|------|-------|
|                                 |          | <25                                          | 25-29.9 | 30-34.9 | 35-39.9 | ≥40  |       |
| <25                             | 24       | 75.0                                         | 25.0    | 0       | 0       | 0    | 0.75  |
| 25-29.9                         | 73       | 12.3                                         | 84.9    | 2.7     | 0       | 0    |       |
| 30-34.9                         | 63       | 0                                            | 12.7    | 77.8    | 9.5     | 0    |       |
| 35-39.9                         | 49       | 0                                            | 2       | 14.3    | 77.6    | 6.1  |       |
| ≥40                             | 34       | 0                                            | 0       | 0       | 14.7    | 85.3 |       |
